# Supplementary material
Source: PubMed Central journal article supplement (PMC7772276)
Supplement: NIHMS1598505-supplement-Supplemental_Material.pdf [file NIHMS1598505-supplement-Supplemental_Material.pdf]

## **SUPPLEMENTAL MATERIAL**

**Supplemental Figure 1.** Analytic Sample Selection Flowchart

**Supplemental Figure 2.** Log Hazard Ratios (95% CIs) of Cardiovascular Disease Events by Baseline Cardiovascular Health Score

**Supplemental Figure 3.** Distribution of Cardiovascular Health Scores

**Supplemental Table 1.** Cardiovascular Health Metrics and Definitions among Participants Included in the Lifetime Risk Pooling Project

**Supplemental Table 2.** Distribution of Follow-up Time in the Cardiovascular Lifetime Risk Pooling Project by Index Age Group, Sex, and Race

**Supplemental Table 3.** Characteristics of White and Black Men Aged Less Than 40 and 60 or More Years Included in the Cardiovascular Lifetime Risk Pooling Project by Cardiovascular Health Score Groups

**Supplemental Table 4.** Characteristics of White and Black Women Aged Less Than 40 and 60 or More Years Included in the Cardiovascular Lifetime Risk Pooling Project by Cardiovascular Health Score Groups

**Supplemental Table 5.** Distribution of Cardiovascular Health Metrics among White and Black Men Included in the Cardiovascular Lifetime Risk Pooling Project by Index Age Group

**Supplemental Table 6.** Distribution of Cardiovascular Health Metrics among White and Black Women Included in the Cardiovascular Lifetime Risk Pooling Project by Index Age Group

**Supplemental Table 7.** Proportion of First Myocardial Infarction, Stroke, and Heart Failure Events by Age, Sex, Race, and Cardiovascular Health Score Groups

**Supplemental Figure 1.** Analytic Sample Selection Flowchart

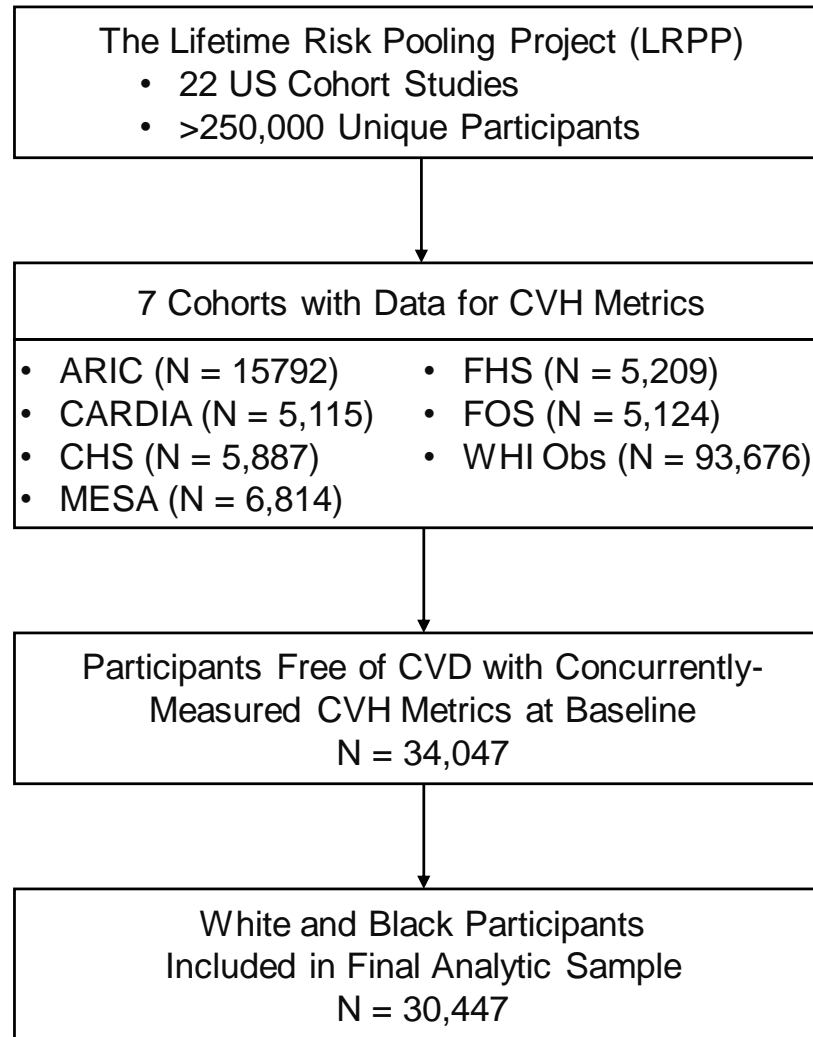

ARIC indicates Atherosclerosis Risk in Communities Study; CARDIA, Coronary Artery Risk Development in Young Adults; CHS, Cardiovascular Health Study; CVD, cardiovascular disease; CVH, cardiovascular health; LRPP, Lifetime Risk Pooling Project; MESA, Multi-Ethnic Study of Atherosclerosis; FHS, Framingham Heart Study; FOS, Framingham Offspring Study; WHI, Women's Health Initiative Observational Study

**Supplemental Figure 2.** Log Hazard Ratios (95% CIs) of Cardiovascular Disease Events by Baseline Cardiovascular Health Score

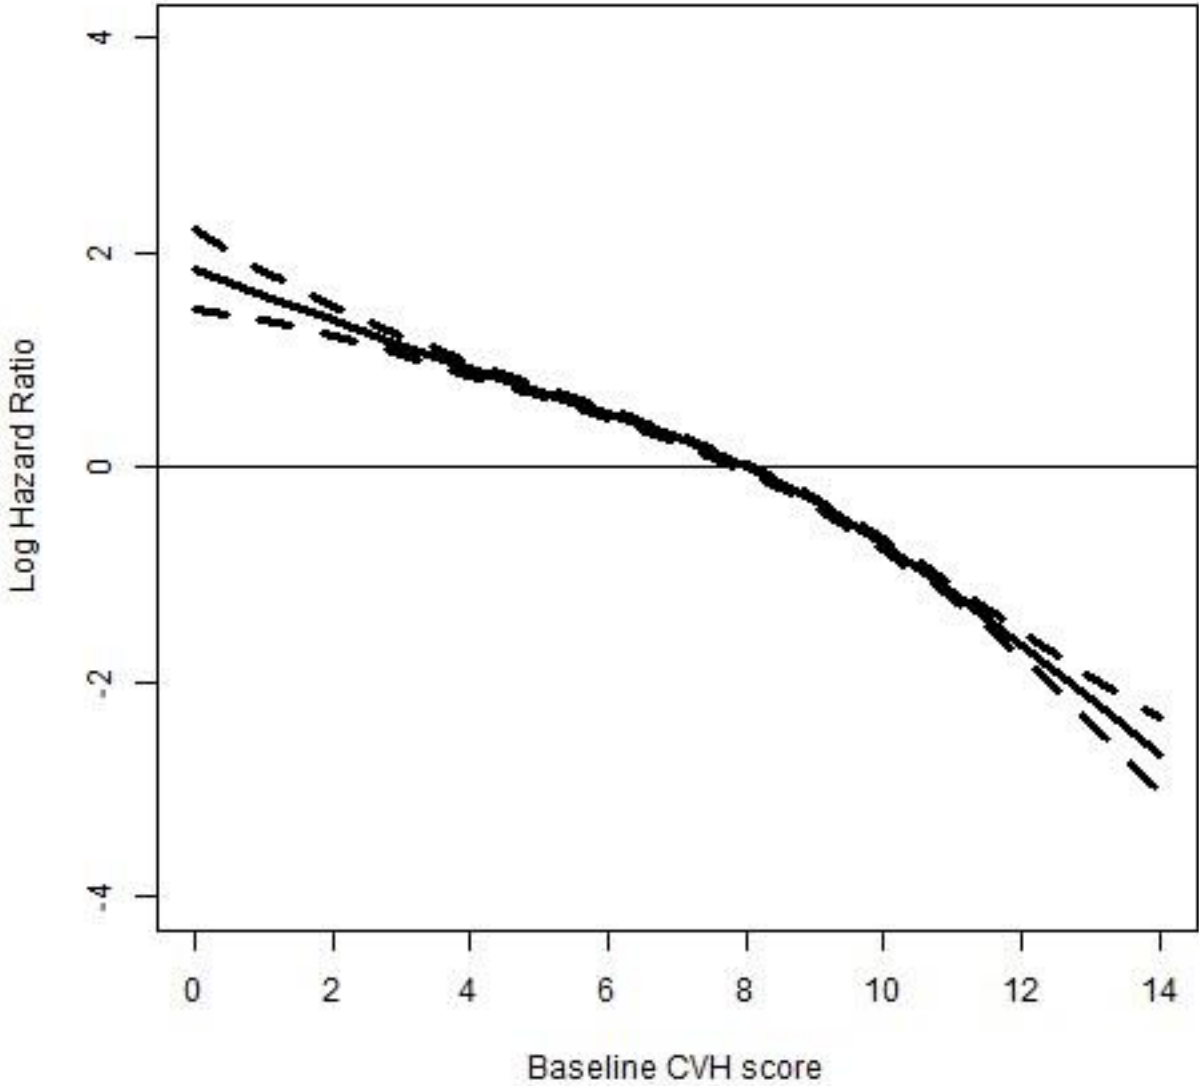

CHV indicates cardiovascular health

Supplemental Figure 3. Distribution of Cardiovascular Health Scores

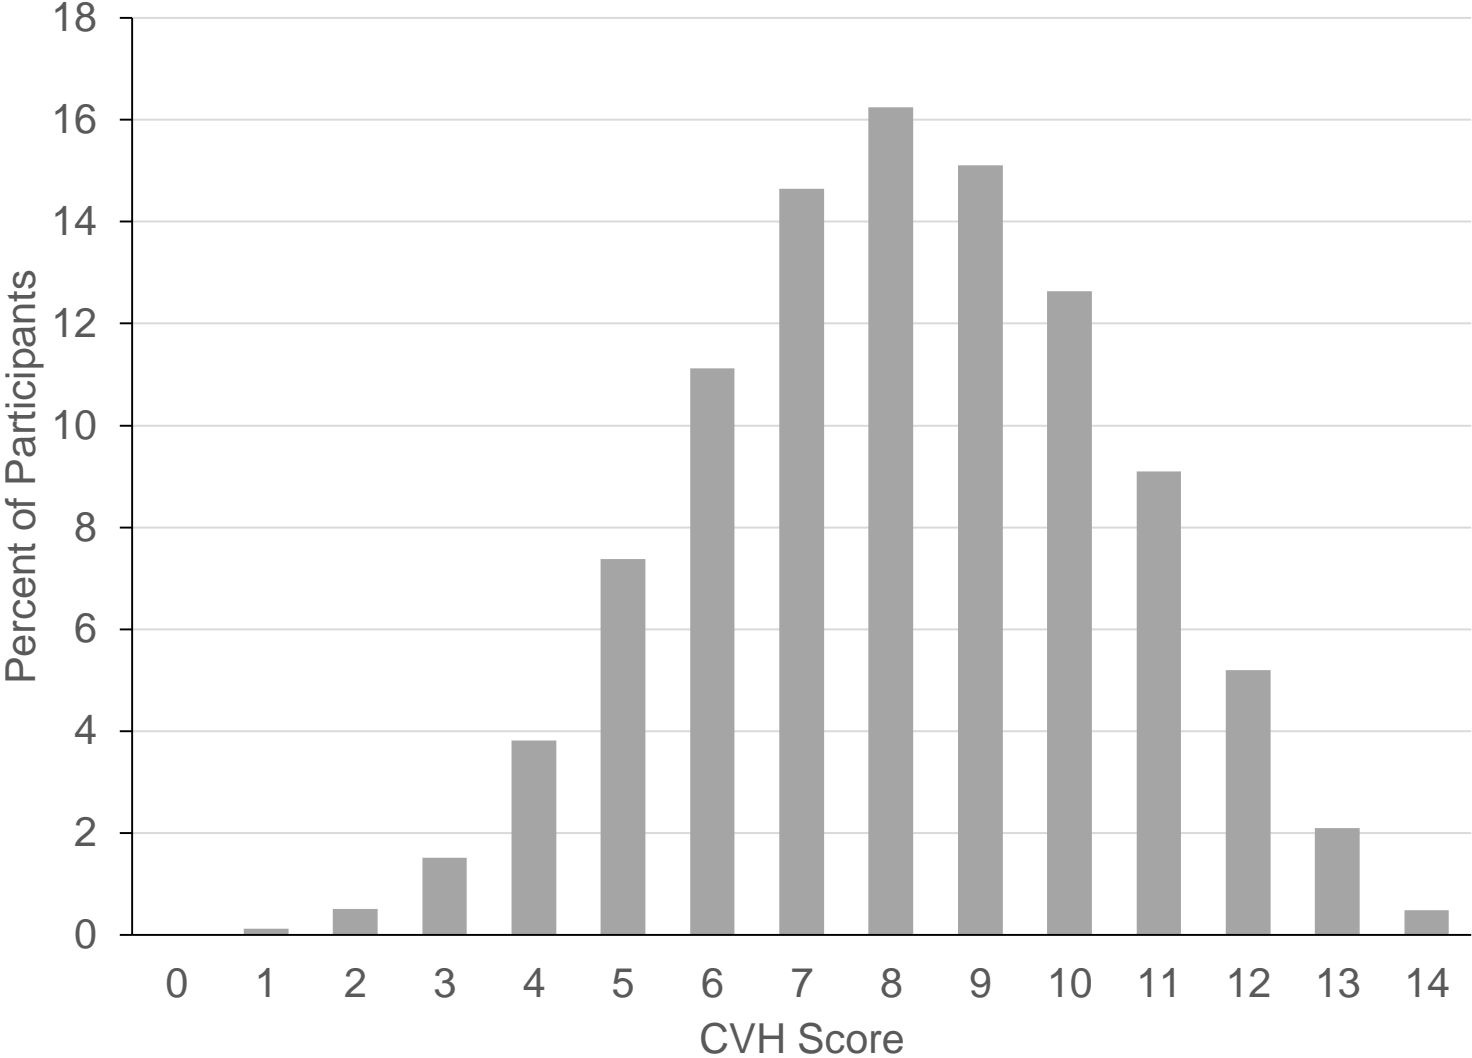

CVH indicates cardiovascular health

**Supplemental Table 1.** Cardiovascular Health Metrics and Definitions among Participants Included in the Lifetime Risk Pooling Project

| Health Metric               | Cardiovascular Health (CVH)        |                                                             |                           |
|-----------------------------|------------------------------------|-------------------------------------------------------------|---------------------------|
|                             | Ideal (2 points)                   | Intermediate (1 point)                                      | Poor (0 points)           |
| <b>Smoking</b>              | Never or quit >12 months           | Former, quit ≤12 months                                     | Current                   |
| <b>Body mass index</b>      | <25 kg/m <sup>2</sup>              | 25–29.99 kg/m <sup>2</sup>                                  | ≥30 kg/m <sup>2</sup>     |
| <b>Physical activity</b> *  | Fourth quartile                    | Third and second quartiles                                  | First quartile            |
| <b>Healthy diet score</b> † | Fifth and fourth quintiles         | Third and second quintiles                                  | First quintile            |
| <b>Total cholesterol</b>    | <200 mg/dL, without medication     | 200-239 mg/dL or treated to <200 mg/dL                      | ≥240 mg/dL                |
| <b>Blood pressure</b>       | <120/<80 mm Hg, without medication | SBP 120–139 or DBP 80–89 mm Hg or treated to <120/<80 mm Hg | SBP ≥140 or DBP ≥90 mm Hg |
| <b>Fasting glucose</b>      | <100 mg/dL, without medication     | 100–125 mg/dL or treated to <100 mg/dL                      | ≥126 mg/dL                |

DBP indicates diastolic blood pressure; SBP, systolic blood pressure

\* Z-scores were calculated from the distribution of physical activity scores in each individual cohort, measured using different metrics, and quartiles were computed

† The Alternate Healthy Eating Index (AHEI-2010) was calculated in each individual cohort and quintiles were computed

**Supplemental Table 2.** Distribution of Follow-up Time in the Cardiovascular Lifetime Risk Pooling Project by Index Age Group, Sex, and Race

|                               | <b>Men, Follow-up Time, Years</b> |                     |                |                | <b>Women, Follow-up Time, Years</b> |                     |                |                |
|-------------------------------|-----------------------------------|---------------------|----------------|----------------|-------------------------------------|---------------------|----------------|----------------|
| <b>Age and Race</b>           | <b>Mean (SD)</b>                  | <b>Median (IQR)</b> | <b>Minimum</b> | <b>Maximum</b> | <b>Mean (SD)</b>                    | <b>Median (IQR)</b> | <b>Minimum</b> | <b>Maximum</b> |
| <b>Index Age &lt;40 years</b> |                                   |                     |                |                |                                     |                     |                |                |
| White                         | 27.5 (5.7)                        | 29.7 (29.1, 30.3)   | 1.04           | 31.3           | 28.3 (4.5)                          | 29.8 (29.3, 30.4)   | 3.15           | 31.3           |
| Black                         | 27.5 (5.8)                        | 29.5 (29.0, 30.1)   | 1.10           | 31.2           | 28.7 (4.0)                          | 29.7 (29.2, 30.2)   | 0.48           | 31.3           |
| <b>Index Age 40-59 years</b>  |                                   |                     |                |                |                                     |                     |                |                |
| White                         | 16.7 (5.4)                        | 18.0 (14.3, 21.8)   | 0.01           | 23.1           | 17.8 (4.7)                          | 20.2 (16.6, 23.1)   | 0.01           | 23.1           |
| Black                         | 15.3 (6.1)                        | 14.6 (10.4, 18.7)   | 0.01           | 23.0           | 14.8 (5.2)                          | 13.8 (9.7, 17.9)    | 0.003          | 23.1           |
| <b>Index Age ≥60 years</b>    |                                   |                     |                |                |                                     |                     |                |                |
| White                         | 12.2 (6.2)                        | 12.9 (8.2, 17.6)    | 0.07           | 22.9           | 14.0 (6.0)                          | 14.0 (9.3, 18.7)    | 0.09           | 23.1           |
| Black                         | 11.4 (5.4)                        | 12.5 (9.5, 15.6)    | 0.24           | 23.0           | 11.5 (4.5)                          | 12.4 (10.3, 14.6)   | 0.03           | 22.8           |

**Supplemental Table 3.** Characteristics of White and Black Men Aged Less Than 40 and 60 or More Years Included in the Cardiovascular Lifetime Risk Pooling Project by Cardiovascular Health Score Groups

|                                     | White Men, CVH |              |              | Black Men, CVH |              |              |
|-------------------------------------|----------------|--------------|--------------|----------------|--------------|--------------|
|                                     | High           | Moderate     | Low          | High           | Moderate     | Low          |
| <b>Age &lt;40 years</b>             |                |              |              |                |              |              |
| Number                              | 297            | 578          | 207          | 93             | 463          | 211          |
| Age, years                          | 26.6 (3.5)     | 26.4 (4.0)   | 27.8 (4.6)   | 24.8 (3.1)     | 25.0 (3.1)   | 26.1 (3.3)   |
| High school education or greater, % | 99.7           | 94.4         | 89.3         | 97.8           | 89.0         | 84.4         |
| Current alcohol drinking, %         | 80.1           | 74.6         | 73.9         | 61.3           | 64.8         | 77.3         |
| Antihypertensive medication use, %  | 0.3            | 1.6          | 5.8          | 0.0            | 1.5          | 6.2          |
| Lipid-lowering medication use, %    | 0.0            | 0.0          | 0.5          | 0.0            | 0.0          | 0.0          |
| History of diabetes, %              | 0.0            | 0.2          | 0.5          | 0.0            | 0.0          | 1.0          |
| Body mass index, kg/m <sup>2</sup>  | 22.9 (2.0)     | 24.5 (3.4)   | 27.5 (4.7)   | 22.9 (2.2)     | 24.1 (3.6)   | 27.0 (5.0)   |
| Physical activity, z-score          | 0.77 (1.03)    | 0.21 (0.92)  | -0.13 (1.02) | 1.03 (1.12)    | 0.36 (1.08)  | -0.27 (0.85) |
| Healthy diet score, aHEI score      | 58.0 (11.5)    | 46.4 (10.8)  | 39.7 (8.8)   | 51.8 (15.2)    | 42.3 (10.1)  | 36.9 (8.6)   |
| Total cholesterol, mg/dL            | 164.2 (23.8)   | 176.7 (32.0) | 201.7 (37.7) | 164.9 (24.8)   | 175.8 (31.7) | 192.3 (40.7) |
| HDL cholesterol, mg/dL              | 49.8 (10.5)    | 46.2 (10.4)  | 42.9 (12.6)  | 55.1 (12.8)    | 53.1 (13.0)  | 52.9 (15.8)  |
| Systolic blood pressure, mmHg       | 111.2 (8.3)    | 114.7 (9.9)  | 120.3 (11.9) | 110.5 (8.8)    | 115.6 (9.8)  | 121.3 (11.0) |
| Diastolic blood pressure, mmHg      | 69.6 (7.6)     | 70.9 (9.1)   | 75.1 (11.3)  | 69.7 (7.7)     | 70.8 (9.5)   | 75.0 (10.7)  |
| Fasting glucose, mg/dL              | 84.1 (7.3)     | 85.8 (10.3)  | 88.3 (16.5)  | 81.2 (6.8)     | 83.4 (8.0)   | 85.9 (14.9)  |
| <b>Age ≥60 years</b>                |                |              |              |                |              |              |
| Number                              | 100            | 1169         | 2373         | 16             | 166          | 536          |
| Age, years                          | 68.1 (5.8)     | 67.8 (5.6)   | 67.3 (5.4)   | 68.1 (5.6)     | 67.8 (5.6)   | 66.1 (5.2)   |
| High school education or greater, % | 93.0           | 84.3         | 76.4         | 87.5           | 79.5         | 58.3         |
| Current alcohol drinking, %         | 69.0           | 66.5         | 59.8         | 87.5           | 50.9         | 43.7         |
| Antihypertensive medication use, %  | 9.0            | 26.1         | 40.3         | 18.8           | 46.4         | 54.9         |
| Lipid-lowering medication use, %    | 3.0            | 7.6          | 8.3          | 0.0            | 8.4          | 12.6         |
| History of diabetes, %              | 0.0            | 1.7          | 5.3          | 6.7            | 5.1          | 19.1         |
| Body mass index, kg/m <sup>2</sup>  | 24.0 (2.4)     | 25.7 (3.0)   | 28.0 (3.7)   | 24.1 (2.7)     | 25.7 (3.9)   | 28.3 (4.7)   |
| Physical activity, z-score          | 1.01 (0.99)    | 0.61 (1.11)  | 0.08 (1.05)  | 1.21 (2.15)    | 0.25 (1.22)  | -0.22 (0.88) |
| Healthy diet score, aHEI-2010 score | 62.6 (9.8)     | 52.6 (11.8)  | 44.9 (10.1)  | 65.0 (8.2)     | 55.1 (12.3)  | 46.4 (11.1)  |

|                                |              |              |              |              |              |              |
|--------------------------------|--------------|--------------|--------------|--------------|--------------|--------------|
| Total cholesterol, mg/dL       | 175.9 (23.9) | 190.5 (30.9) | 208.9 (38.8) | 180.9 (24.9) | 176.0 (33.6) | 200.2 (40.1) |
| HDL cholesterol, mg/dL         | 46.8 (12.1)  | 46.8 (12.8)  | 44.6 (12.7)  | 57.8 (15.0)  | 50.2 (15.5)  | 50.3 (15.2)  |
| Systolic blood pressure, mmHg  | 114.8 (11.2) | 123.9 (17.9) | 136.1 (19.7) | 115.3 (11.7) | 126.3 (18.4) | 137.9 (19.8) |
| Diastolic blood pressure, mmHg | 67.7 (7.9)   | 70.9 (9.4)   | 74.8 (10.3)  | 72.8 (7.7)   | 74.8 (8.4)   | 79.5 (11.7)  |
| Fasting glucose, mg/dL         | 89.3 (8.0)   | 96.0 (14.6)  | 114.6 (37.6) | 87.8 (8.6)   | 92.4 (20.2)  | 114.8 (42.5) |

Values are expressed as mean (standard deviation) or number (%).

aHEI-2010 indicates adjusted Healthy Eating Index 2010; CVH, cardiovascular health; DBP, diastolic blood pressure; HDL, high-density lipoprotein; SBP, systolic blood pressure



**Supplemental Table 4.** Characteristics of White and Black Women Aged Less Than 40 and 60 or More Years Included in the Cardiovascular Lifetime Risk Pooling Project by Cardiovascular Health Score Groups

|                                     | White Women, CVH |              |              | Black Women, CVH |              |              |
|-------------------------------------|------------------|--------------|--------------|------------------|--------------|--------------|
|                                     | High             | Moderate     | Low          | High             | Moderate     | Low          |
| <b>Age &lt;40 years</b>             |                  |              |              |                  |              |              |
| Number                              | 481              | 588          | 164          | 121              | 672          | 361          |
| Age, years                          | 26.8 (3.8)       | 26.8 (4.0)   | 26.6 (4.2)   | 25.1 (3.3)       | 25.1 (3.3)   | 26.0 (3.3)   |
| High school education or greater, % | 98.7             | 95.1         | 84.7         | 95.9             | 91.7         | 85.6         |
| Current alcohol drinking, %         | 67.2             | 64.0         | 58.5         | 41.3             | 43.8         | 49.0         |
| Antihypertensive medication use, %  | 0.2              | 1.9          | 2.4          | 0.0              | 2.5          | 8.6          |
| Lipid-lowering medication use, %    | 0.0              | 0.0          | 0.0          | 0.0              | 0.0          | 0.0          |
| History of diabetes, %              | 0.0              | 0.3          | 2.4          | 0.0              | 0.3          | 0.8          |
| Body mass index, kg/m <sup>2</sup>  | 21.7 (2.3)       | 23.2 (4.1)   | 28.1 (6.7)   | 22.4 (2.5)       | 24.9 (5.8)   | 29.7 (7.4)   |
| Physical activity, z-score          | 0.39 (0.89)      | -0.24 (0.73) | -0.63 (0.58) | 0.27 (0.82)      | -0.48 (0.69) | -0.82 (0.51) |
| Healthy diet score, aHEI score      | 61.4 (9.5)       | 51.0 (10.5)  | 41.5 (9.9)   | 56.0 (11.2)      | 44.6 (10.1)  | 40.5 (8.1)   |
| Total cholesterol, mg/dL            | 168.6 (24.8)     | 178.9 (31.2) | 191.4 (34.0) | 168.1 (24.8)     | 174.9 (30.2) | 189.8 (38.8) |
| HDL cholesterol, mg/dL              | 58.5 (11.9)      | 57.0 (13.4)  | 47.9 (13.4)  | 58.4 (11.4)      | 56.9 (12.8)  | 51.6 (12.5)  |
| Systolic blood pressure, mmHg       | 103.1 (7.8)      | 105.1 (9.8)  | 109.4 (11.0) | 104.8 (8.1)      | 106.9 (9.0)  | 112.1 (11.1) |
| Diastolic blood pressure, mmHg      | 65.2 (7.1)       | 66.6 (8.6)   | 68.0 (9.4)   | 66.0 (7.5)       | 66.6 (8.6)   | 70.2 (10.5)  |
| Fasting glucose, mg/dL              | 81.0 (6.6)       | 81.5 (12.0)  | 86.6 (27.8)  | 77.8 (7.8)       | 79.2 (15.2)  | 85.4 (31.2)  |
| <b>Age ≥60 years</b>                |                  |              |              |                  |              |              |
| Number                              | 183              | 1437         | 2987         | 57               | 726          | 2029         |
| Age, years                          | 67.4 (5.6)       | 67.6 (5.5)   | 68.1 (5.4)   | 65.8 (4.6)       | 66.9 (5.3)   | 66.5 (5.0)   |
| High school education or greater, % | 93.4             | 85.4         | 76.9         | 92.3             | 92.1         | 78.5         |
| Current alcohol drinking, %         | 59.0             | 53.8         | 45.1         | 50.0             | 52.1         | 40.5         |
| Antihypertensive medication use, %  | 10.4             | 25.5         | 45.9         | 14.0             | 39.7         | 58.9         |
| Lipid-lowering medication use, %    | 6.0              | 7.1          | 9.1          | 8.8              | 14.7         | 18.4         |
| History of diabetes, %              | 0.0              | 0.5          | 4.1          | 0.0              | 3.2          | 16.2         |
| Body mass index, kg/m <sup>2</sup>  | 22.6 (2.3)       | 24.3 (3.4)   | 28.0 (4.9)   | 23.6 (3.3)       | 26.8 (4.7)   | 31.2 (6.1)   |
| Physical activity, z-score          | 0.92 (1.27)      | 0.24 (0.95)  | -0.25 (0.77) | 0.80 (1.27)      | 0.26 (0.96)  | -0.20 (0.97) |
| Healthy diet score, aHEI-2010 score | 63.3 (10.9)      | 53.6 (12.8)  | 45.1 (11.1)  | 65.5 (8.6)       | 61.3 (10.7)  | 51.8 (11.1)  |

|                                |              |              |              |              |              |              |
|--------------------------------|--------------|--------------|--------------|--------------|--------------|--------------|
| Total cholesterol, mg/dL       | 190.8 (24.7) | 209.2 (32.0) | 229.4 (38.9) | 193.8 (29.3) | 207.6 (36.1) | 227.1 (44.3) |
| HDL cholesterol, mg/dL         | 64.2 (14.4)  | 62.0 (16.6)  | 56.1 (16.1)  | 62.9 (13.3)  | 61.4 (15.1)  | 56.8 (14.7)  |
| Systolic blood pressure, mmHg  | 114.9 (14.0) | 124.5 (18.8) | 136.2 (20.5) | 116.3 (9.7)  | 126.7 (16.9) | 137.7 (20.1) |
| Diastolic blood pressure, mmHg | 64.8 (7.9)   | 67.5 (9.6)   | 71.0 (10.5)  | 70.0 (7.3)   | 73.6 (9.2)   | 76.9 (10.3)  |
| Fasting glucose, mg/dL         | 88.0 (7.9)   | 92.1 (11.5)  | 108.0 (32.6) | 88.3 (8.2)   | 90.7 (13.9)  | 110.5 (42.6) |

Values are expressed as mean (standard deviation) or number (%).

aHEI indicates adjusted Healthy Eating Index 2010; CVH, cardiovascular health; DBP, diastolic blood pressure; HDL, high-density lipoprotein; SBP, systolic blood pressure

**Supplemental Table 5.** Distribution of Cardiovascular Health Metrics among White and Black Men Included in the Cardiovascular Lifetime Risk Pooling Project by Index Age Group

| Health Metric             | White Men, %               |                              |                            | Black Men, %             |                              |                          |
|---------------------------|----------------------------|------------------------------|----------------------------|--------------------------|------------------------------|--------------------------|
|                           | Age <40 years<br>(n=1,082) | Age 40-59 years<br>(n=4,621) | Age ≥60 years<br>(n=3,642) | Age <40 years<br>(n=767) | Age 40-59 years<br>(n=1,178) | Age ≥60 years<br>(n=718) |
| <b>Smoking</b>            |                            |                              |                            |                          |                              |                          |
| Ideal                     | 58.6                       | 34.0                         | 34.6                       | 54.4                     | 32.5                         | 29.3                     |
| Intermediate              | 16.0                       | 41.9                         | 53.1                       | 9.9                      | 31.1                         | 48.5                     |
| Poor                      | 25.4                       | 24.1                         | 12.4                       | 35.7                     | 36.4                         | 22.3                     |
| <b>Body mass index</b>    |                            |                              |                            |                          |                              |                          |
| Ideal                     | 61.9                       | 25.8                         | 29.1                       | 60.1                     | 25.8                         | 28.6                     |
| Intermediate              | 30.6                       | 50.2                         | 51.0                       | 29.3                     | 44.6                         | 42.8                     |
| Poor                      | 7.5                        | 24.0                         | 19.9                       | 10.6                     | 29.6                         | 28.7                     |
| <b>Physical activity</b>  |                            |                              |                            |                          |                              |                          |
| Ideal                     | 36.4                       | 34.9                         | 34.4                       | 34.3                     | 21.9                         | 19.1                     |
| Intermediate              | 50.7                       | 47.2                         | 48.8                       | 48.0                     | 50.9                         | 52.5                     |
| Poor                      | 12.9                       | 17.9                         | 16.9                       | 17.7                     | 27.2                         | 28.4                     |
| <b>Healthy diet score</b> |                            |                              |                            |                          |                              |                          |
| Ideal                     | 20.2                       | 13.0                         | 12.0                       | 8.5                      | 11.5                         | 15.7                     |
| Intermediate              | 41.4                       | 35.4                         | 37.5                       | 32.3                     | 31.8                         | 37.2                     |
| Poor                      | 38.5                       | 51.7                         | 50.5                       | 59.2                     | 56.7                         | 47.1                     |
| <b>Total cholesterol</b>  |                            |                              |                            |                          |                              |                          |
| Ideal                     | 76.2                       | 41.4                         | 45.0                       | 75.1                     | 48.3                         | 49.0                     |
| Intermediate              | 19.0                       | 40.6                         | 40.5                       | 19.7                     | 32.7                         | 38.9                     |
| Poor                      | 4.8                        | 17.9                         | 14.5                       | 5.2                      | 19.0                         | 12.1                     |
| <b>Blood pressure</b>     |                            |                              |                            |                          |                              |                          |
| Ideal                     | 63.4                       | 45.8                         | 21.1                       | 56.7                     | 26.8                         | 13.2                     |
| Intermediate              | 33.3                       | 43.1                         | 47.8                       | 38.7                     | 43.3                         | 46.8                     |
| Poor                      | 3.3                        | 11.1                         | 31.1                       | 4.6                      | 29.9                         | 40.0                     |
| <b>Fasting glucose</b>    |                            |                              |                            |                          |                              |                          |
| Ideal                     | 95.0                       | 52.7                         | 48.1                       | 97.4                     | 54.8                         | 49.6                     |
| Intermediate              | 4.3                        | 41.7                         | 40.6                       | 2.2                      | 35.0                         | 35.7                     |
| Poor                      | 0.7                        | 5.6                          | 11.3                       | 0.4                      | 10.3                         | 14.8                     |

Percentages may not add up to exactly 100.0% due to rounding

DBP indicates diastolic blood pressure; SBP, systolic blood pressure

**Supplemental Table 6.** Distribution of Cardiovascular Health Metrics among White and Black Women Included in the Cardiovascular Lifetime Risk Pooling Project by Index Age Group

| Health Metric             | White Women, %             |                              |                            | Black Women, %             |                              |                            |
|---------------------------|----------------------------|------------------------------|----------------------------|----------------------------|------------------------------|----------------------------|
|                           | Age <40 years<br>(n=1,233) | Age 40-59 years<br>(n=5,568) | Age ≥60 years<br>(n=4,607) | Age <40 years<br>(n=1,154) | Age 40-59 years<br>(n=3,065) | Age ≥60 years<br>(n=2,812) |
| <b>Smoking</b>            |                            |                              |                            |                            |                              |                            |
| Ideal                     | 52.5                       | 49.6                         | 57.2                       | 58.2                       | 53.3                         | 51.9                       |
| Intermediate              | 21.0                       | 26.2                         | 28.6                       | 9.6                        | 27.2                         | 36.9                       |
| Poor                      | 26.5                       | 24.3                         | 14.3                       | 23.2                       | 19.5                         | 11.2                       |
| <b>Body mass index</b>    |                            |                              |                            |                            |                              |                            |
| Ideal                     | 75.9                       | 47.4                         | 42.33                      | 54.6                       | 17.4                         | 20.6                       |
| Intermediate              | 16.4                       | 30.4                         | 35.5                       | 22.6                       | 33.6                         | 36.3                       |
| Poor                      | 7.7                        | 22.2                         | 22.2                       | 22.8                       | 49.0                         | 43.1                       |
| <b>Physical activity</b>  |                            |                              |                            |                            |                              |                            |
| Ideal                     | 23.2                       | 23.1                         | 20.7                       | 10.0                       | 18.7                         | 22.6                       |
| Intermediate              | 55.5                       | 50.7                         | 53.3                       | 45.0                       | 49.5                         | 45.5                       |
| Poor                      | 21.3                       | 26.2                         | 26.0                       | 45.1                       | 31.8                         | 31.9                       |
| <b>Healthy diet score</b> |                            |                              |                            |                            |                              |                            |
| Ideal                     | 36.1                       | 19.9                         | 16.0                       | 10.3                       | 22.7                         | 27.6                       |
| Intermediate              | 42.7                       | 44.2                         | 35.3                       | 40.9                       | 39.7                         | 44.7                       |
| Poor                      | 21.2                       | 35.9                         | 48.6                       | 48.8                       | 37.6                         | 27.7                       |
| <b>Total cholesterol</b>  |                            |                              |                            |                            |                              |                            |
| Ideal                     | 79.2                       | 40.1                         | 25.6                       | 73.6                       | 38.1                         | 26.0                       |
| Intermediate              | 17.8                       | 38.6                         | 45.1                       | 21.6                       | 36.5                         | 43.4                       |
| Poor                      | 2.9                        | 21.3                         | 29.3                       | 4.9                        | 25.4                         | 30.6                       |
| <b>Blood pressure</b>     |                            |                              |                            |                            |                              |                            |
| Ideal                     | 89.8                       | 55.3                         | 22.5                       | 81.7                       | 24.1                         | 12.3                       |
| Intermediate              | 9.5                        | 35.1                         | 44.6                       | 16.4                       | 48.8                         | 50.9                       |
| Poor                      | 0.7                        | 9.6                          | 32.9                       | 1.9                        | 27.2                         | 36.8                       |
| <b>Fasting glucose</b>    |                            |                              |                            |                            |                              |                            |
| Ideal                     | 97.4                       | 70.4                         | 59.9                       | 97.3                       | 62.8                         | 61.7                       |
| Intermediate              | 2.0                        | 25.1                         | 32.0                       | 1.7                        | 25.5                         | 25.2                       |
| Poor                      | 0.6                        | 4.5                          | 8.0                        | 1.0                        | 11.7                         | 13.2                       |

Percentages may not add up to exactly 100.0% due to rounding

DBP indicates diastolic blood pressure; SBP, systolic blood pressure

**Supplemental Table 7.** Proportion of First Myocardial Infarction, Stroke, and Heart Failure Events by Age, Sex, Race, and Cardiovascular Health Score Groups

| Cardiovascular Health   | White Participants, Proportion of Events |        |               | Black Participants, Proportion of Events |        |               |
|-------------------------|------------------------------------------|--------|---------------|------------------------------------------|--------|---------------|
|                         | Myocardial Infarction                    | Stroke | Heart Failure | Myocardial Infarction                    | Stroke | Heart Failure |
| <b>Men</b>              |                                          |        |               |                                          |        |               |
| <b>Age &lt;40 years</b> |                                          |        |               |                                          |        |               |
| <i>High CVH</i>         | 100.0                                    | 0.0    | 0.0           | 50.0                                     | 50.0   | 0.0           |
| <i>Moderate CVH</i>     | 86.7                                     | 10.0   | 3.3           | 37.1                                     | 28.6   | 34.3          |
| <i>Low CVH</i>          | 67.6                                     | 11.8   | 20.6          | 47.4                                     | 21.1   | 31.6          |
| <b>Age 40-59 years</b>  |                                          |        |               |                                          |        |               |
| <i>High CVH</i>         | 33.3                                     | 50.0   | 16.7          | 0.0                                      | 0.0    | 100.0         |
| <i>Moderate CVH</i>     | 48.0                                     | 22.2   | 29.8          | 37.1                                     | 28.6   | 34.3          |
| <i>Low CVH</i>          | 48.6                                     | 16.4   | 35.0          | 40.6                                     | 23.3   | 36.1          |
| <b>Age ≥60 years</b>    |                                          |        |               |                                          |        |               |
| <i>High CVH</i>         | 44.4                                     | 25.9   | 29.6          | 66.7                                     | 33.3   | 0.0           |
| <i>Moderate CVH</i>     | 46.1                                     | 19.7   | 34.2          | 36.4                                     | 27.3   | 36.4          |
| <i>Low CVH</i>          | 43.0                                     | 19.3   | 37.8          | 48.3                                     | 17.7   | 33.9          |
| <b>Women</b>            |                                          |        |               |                                          |        |               |
| <b>Age &lt;40 years</b> |                                          |        |               |                                          |        |               |
| <i>High CVH</i>         | 30.0                                     | 30.0   | 40.0          | 0.0                                      | 100.0  | 0.0           |
| <i>Moderate CVH</i>     | 42.9                                     | 42.9   | 14.3          | 34.4                                     | 40.6   | 25.0          |
| <i>Low CVH</i>          | 90.0                                     | 10.0   | 0.0           | 27.0                                     | 40.5   | 32.4          |
| <b>Age 40-59 years</b>  |                                          |        |               |                                          |        |               |
| <i>High CVH</i>         | 33.3                                     | 20.0   | 46.7          | - *                                      | - *    | - *           |
| <i>Moderate CVH</i>     | 33.2                                     | 30.5   | 36.3          | 49.3                                     | 25.4   | 25.4          |
| <i>Low CVH</i>          | 36.9                                     | 17.7   | 45.3          | 36.4                                     | 25.1   | 38.5          |
| <b>Age ≥60 years</b>    |                                          |        |               |                                          |        |               |
| <i>High CVH</i>         | 44.7                                     | 18.4   | 36.8          | 50.0                                     | 50.0   | 0.0           |
| <i>Moderate CVH</i>     | 36.8                                     | 29.3   | 33.9          | 46.8                                     | 26.1   | 27.0          |
| <i>Low CVH</i>          | 39.0                                     | 23.5   | 37.4          | 46.3                                     | 22.0   | 31.7          |

\*No events were observed during follow-up in this group

CVH indicates cardiovascular health
